# Supplementary material for: A systematic review of the usefulness of magnetic resonance imaging in predicting the gait ability of stroke patients
Source: PubMed Central journal article supplement (PMC8275756; doi:10.1038/s41598-021-93717-4), 2021-07-12
Supplement: 41598_2021_93717_MOESM1_ESM.pdf [file 41598_2021_93717_MOESM1_ESM.pdf]

## **Supplementary File 1. Search strategy**

**A systematic review of the usefulness of magnetic resonance imaging in predicting the gait ability of stroke patients**

Takeshi Imura\*, PhD<sup>1</sup>, Tsubasa Mitsutake, PhD<sup>2</sup>, Yuji Iwamoto, M.S.<sup>3</sup>, Ryo Tanaka, PhD<sup>3</sup>

**Supplementary File 1. Search strategy**

|               | Search number                   | Query                                                                                                                                                                    |                                                                                                                                                                                                                                                                                                                                                                                                                                                                                                                                                                                                                                                                                                                         |
|---------------|---------------------------------|--------------------------------------------------------------------------------------------------------------------------------------------------------------------------|-------------------------------------------------------------------------------------------------------------------------------------------------------------------------------------------------------------------------------------------------------------------------------------------------------------------------------------------------------------------------------------------------------------------------------------------------------------------------------------------------------------------------------------------------------------------------------------------------------------------------------------------------------------------------------------------------------------------------|
|               | #15                             | Search (#4 and #9 and #13) NOT ("animals"[MeSH Terms:noexp] NOT "humans"[MeSH Terms])NOT "healthy"[Title/Abstract]) NOT "child"[MeSH Terms]) NOT "child"[Title/Abstract] |                                                                                                                                                                                                                                                                                                                                                                                                                                                                                                                                                                                                                                                                                                                         |
|               | #14                             | Search (#4 and #9 and #13)                                                                                                                                               |                                                                                                                                                                                                                                                                                                                                                                                                                                                                                                                                                                                                                                                                                                                         |
| P and E and O | #13                             | Search (#10 or #11 or #12)                                                                                                                                               |                                                                                                                                                                                                                                                                                                                                                                                                                                                                                                                                                                                                                                                                                                                         |
| O             | Gait performance                | #12                                                                                                                                                                      | ((Walking[MeSH Terms]) OR (Walking[Title/Abstract])) OR (Ambulation[Title/Abstract])                                                                                                                                                                                                                                                                                                                                                                                                                                                                                                                                                                                                                                    |
|               |                                 | #11                                                                                                                                                                      | ((Gait[MeSH Terms]) OR (Gait[Title/Abstract])) OR (Gaits[Title/Abstract])                                                                                                                                                                                                                                                                                                                                                                                                                                                                                                                                                                                                                                               |
|               |                                 | #10                                                                                                                                                                      | (((((Clinical Decision Rules[MeSH Terms]) OR (Clinical Decision Rules[Title/Abstract])) OR (Clinical Decision Rule[Title/Abstract])) OR (Decision Rule, Clinical[Title/Abstract])) OR (Clinical Prediction Rule[Title/Abstract])) OR (Prediction Rule, Clinical[Title/Abstract])) OR (Rule, Clinical Prediction[Title/Abstract])) OR (Prediction[Title/Abstract])) OR (Clinicalprediction[Title/Abstract])                                                                                                                                                                                                                                                                                                              |
|               |                                 | #9                                                                                                                                                                       | Search (#5 or #6 or #7 or #8)                                                                                                                                                                                                                                                                                                                                                                                                                                                                                                                                                                                                                                                                                           |
| E             | Magnetic resonance neuroimaging | #8                                                                                                                                                                       | (((((Diffusion Tensor Imaging[MeSH Terms]) OR (Diffusion Tensor Imaging[Title/Abstract])) OR (Imaging, Diffusion Tensor[Title/Abstract])) OR (Diffusion Tensor Magnetic Resonance Imaging[Title/Abstract])) OR (Diffusion Tensor MRI[Title/Abstract])) OR (MRI, Diffusion Tensor[Title/Abstract])) OR (DTI MRI[Title/Abstract])) OR (Diffusion Tractography[Title/Abstract])) OR (Tractography, Diffusion[Title/Abstract])                                                                                                                                                                                                                                                                                              |
|               |                                 | #7                                                                                                                                                                       | (((((Diffusion Magnetic Resonance Imaging[MeSH Terms]) OR (Diffusion Magnetic Resonance Imaging[Title/Abstract])) OR (Magnetic Resonance Imaging, Diffusion[Title/Abstract])) OR (Diffusion MRI[Title/Abstract])) OR (Diffusion Weighted MRI[Title/Abstract])) OR (MRI, Diffusion Weighted[Title/Abstract])                                                                                                                                                                                                                                                                                                                                                                                                             |
|               |                                 | #6                                                                                                                                                                       | ((((((((((((((Magnetic Resonance Imaging[MeSH Terms]) OR (Magnetic Resonance Imaging[Title/Abstract])) OR (Imaging, Magnetic Resonance[Title/Abstract])) OR (NMR Imaging[Title/Abstract])) OR (Imaging, NMR[Title/Abstract])) OR (MR Tomography[Title/Abstract])) OR (Steady State Free Precession MRI[Title/Abstract])) OR (Zeugmatography[Title/Abstract])) OR (Chemical Shift Imaging[Title/Abstract])) OR (Proton Spin Tomography[Title/Abstract])) OR (Magnetization Transfer Contrast Imaging[Title/Abstract])) OR (MRI Scan[Title/Abstract])) OR (fMRI[Title/Abstract])) OR (Functional MRI[Title/Abstract])) OR (Functional Magnetic Resonance Imaging[Title/Abstract])) OR (Spin Echo Imaging[Title/Abstract]) |

|   |        |    |                                                                                                                                                                                                                                                                                                                                                                                                                                                                                   |
|---|--------|----|-----------------------------------------------------------------------------------------------------------------------------------------------------------------------------------------------------------------------------------------------------------------------------------------------------------------------------------------------------------------------------------------------------------------------------------------------------------------------------------|
|   |        | #5 | ((Neuroimaging[MeSH Terms]) OR (Neuroimaging[Title/Abstract])) OR (Brain Imaging[Title/Abstract]) OR (Imaging, Brain[Title/Abstract])                                                                                                                                                                                                                                                                                                                                             |
| P | Stroke | #4 | Search (#1 or #2 or #3)                                                                                                                                                                                                                                                                                                                                                                                                                                                           |
|   |        | #3 | ((Intracranial Hemorrhage[MeSH Terms]) OR (Intracranial Hemorrhage[Title/Abstract])) OR (Posterior Fossa Hemorrhage[Title/Abstract])                                                                                                                                                                                                                                                                                                                                              |
|   |        | #2 | (((((Brain Infarction[MeSH Terms]) OR (Brain Infarction[Title/Abstract])) OR (Anterior Circulation Brain Infarction[Title/Abstract])) OR (Venous Infarction[Title/Abstract])) OR (Brain Venous Infarction[Title/Abstract])) OR (Venous Brain Infarction[Title/Abstract])) OR (Anterior Cerebral Circulation Infarction[Title/Abstract])) OR (Posterior Circulation Brain Infarction[Title/Abstract])                                                                              |
|   |        | #1 | ((((((((((Stroke[MeSH Terms]) OR (Stroke[Title/Abstract])) OR (Cerebrovascular Accident[Title/Abstract])) OR (CVA[Title/Abstract])) OR (Cerebrovascular Apoplexy[Title/Abstract])) OR (Vascular Accident[Title/Abstract])) OR (Brain Vascular Accident[Title/Abstract])) OR (Cerebrovascular Stroke[Title/Abstract])) OR (Apoplexy[Title/Abstract])) OR (Cerebral Stroke[Title/Abstract])) OR (Acute Stroke[Title/Abstract])) OR (Acute Cerebrovascular Accident[Title/Abstract]) |
