# Supplementary material for: A systematic review of the usefulness of magnetic resonance imaging in predicting the gait ability of stroke patients
Source: PubMed Central journal article supplement (PMC8275756; doi:10.1038/s41598-021-93717-4), 2021-07-12
Supplement: 41598_2021_93717_MOESM2_ESM.pdf [file 41598_2021_93717_MOESM2_ESM.pdf]

**Supplementary File 2. Predetermined criteria for risk of bias evaluation**

**A systematic review of the usefulness of magnetic resonance imaging in predicting the gait ability of stroke patients**

Takeshi Imura\*, PhD<sup>1</sup>, Tsubasa Mitsutake, PhD<sup>2</sup>, Yuji Iwamoto, M.S.<sup>3</sup>, Ryo Tanaka, PhD<sup>3</sup>

**Supplementary File 2. Predetermined criteria for risk of bias evaluation**

|                                                                                                                                                                                        | DY (low risk of bias)                                                                                                                                                                                         | PY                                                                                                                                                                                                                     | PN                                                                                                                                                                                                                                 | DN (high risk of bias)                         |
|----------------------------------------------------------------------------------------------------------------------------------------------------------------------------------------|---------------------------------------------------------------------------------------------------------------------------------------------------------------------------------------------------------------|------------------------------------------------------------------------------------------------------------------------------------------------------------------------------------------------------------------------|------------------------------------------------------------------------------------------------------------------------------------------------------------------------------------------------------------------------------------|------------------------------------------------|
| 1. Was selection of exposed and non-exposed cohorts drawn from the same population?                                                                                                    | Cohort study divided by exposed factor                                                                                                                                                                        | Cohort study without grouping                                                                                                                                                                                          | Case-control study                                                                                                                                                                                                                 | NA                                             |
| 2. Can we be confident in the assessment of exposure?                                                                                                                                  | Meet all criteria<br>1. The reliability has been established<br>2. Evaluator was blinded to other data<br>3. One skilled evaluator or more than 2 evaluators                                                  | Meet 2 criteria in the left column                                                                                                                                                                                     | Meet 1 criteria in the left column                                                                                                                                                                                                 | Not mentioned                                  |
| 3. Can we be confident that the outcome of interest was not present at start of study?                                                                                                 | All included studies were defined as DY because of our selection criterion (4)                                                                                                                                | —                                                                                                                                                                                                                      | —                                                                                                                                                                                                                                  | —                                              |
| 4. Did the study match exposed and unexposed for all variables that are associated with the outcome of interest or did the statistical analysis adjust for these prognostic variables? | Meet the all criteria<br>1. Group comparison<br>2. The similarity of all variables except the exposed factor between groups was confirmed                                                                     | Meet any criteria<br>1. Group comparison, but did not meet the criteria in the left column<br>2. ANCOVA, multiple regression analysis, logistic regression analysis with all plausible variables, or subgroup analysis | Meet any criteria<br>1. ANCOVA, multiple regression analysis, logistic regression analysis with some plausible variables, or subgroup analysis<br>2. The variables between groups showed similarity as haphazard, without analysis | Not confirmed                                  |
| 5. Can we be confident in the assessment of the presence or absence of prognostic factors?                                                                                             | Evaluated prognostic factors (at least 1 factor) meet all criteria<br>1. The reliability has been established<br>2. Evaluator was blinded to other data<br>3. One skilled evaluator or more than 2 evaluators | Meet 2 criteria in the left column                                                                                                                                                                                     | Meet 1 criteria in the left column                                                                                                                                                                                                 | Not mentioned                                  |
| 6. Can we be confident in the assessment of outcome?                                                                                                                                   | Evaluated outcomes (at least 1 outcome) meet all criteria<br>1. The reliability has been established<br>2. Evaluator was blinded to other data<br>3. One skilled evaluator or more than 2 evaluators          | Meet 2 criteria in the left column                                                                                                                                                                                     | Meet 1 criteria in the left column                                                                                                                                                                                                 | Not mentioned                                  |
| 7. Was the follow up of cohorts adequate?                                                                                                                                              | More than 85% of participants were followed up                                                                                                                                                                | More than 75% of participants were followed up                                                                                                                                                                         | More than 65% of participants were followed up                                                                                                                                                                                     | More than 55% of participants were followed up |
| 8. Were co-interventions similar between groups?                                                                                                                                       | The content of co-interventions between participants was strictly equal.                                                                                                                                      | The content of co-interventions is mentioned (single-center study)                                                                                                                                                     | One of the following<br>1. There was no mention about the content of co-interventions.<br>2. The content of co-interventions is mentioned (multi-center study)                                                                     | There was no equalization of co-interventions  |

ANCOVA, analysis of covariance; DN, definitely no; DY, definitely yes; NA, not applicable; PN, probably no; PY, probably yes
